# Supplementary material for: Fabrication and Characterization of an Electrospun PHA/Graphene Silver Nanocomposite Scaffold for Antibacterial Applications
Source: Materials (Basel). 2018 Sep 10;11(9):1673. doi: 10.3390/ma11091673 (PMC6163631; doi:10.3390/ma11091673)
Supplement: Supplementary file 1 [file materials-11-01673-s001.pdf]

## Supporting Information

**Journal:** Materials

**Title:** “Fabrication and Characterization of Electrospun PHA/Graphene Silver Nano-Composite Scaffold for Antibacterial Applications - Supplementary material”

**Authors:** Abdul Mukheem, Kasturi Muthoosamy, Sivakumar Manickam, Kumar Sudesh, Syed Shahabuddin, Saidur Rahman, N. Akbar, Nanthini Sridewi

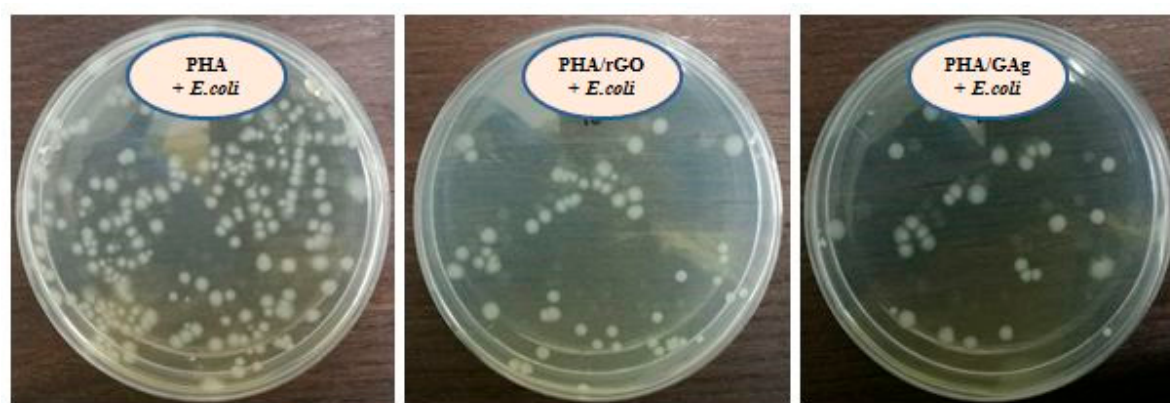

**Figure S1** At the time interval of 4 h bactericidal activity of PHA, PHA/rGO and PHA/GAg against *E.coli* was evaluated. Significant decrease is observed in the CFU which demonstrates the bactericidal activity of PHA/rGO and PHA/GAg compare to PHA alone. PHA/GAg is consider very effective with its dual mode of action (reduced graphene and silver nanoparticles) towards the *E.coli* and is highly significant. Positive control data has not presented here

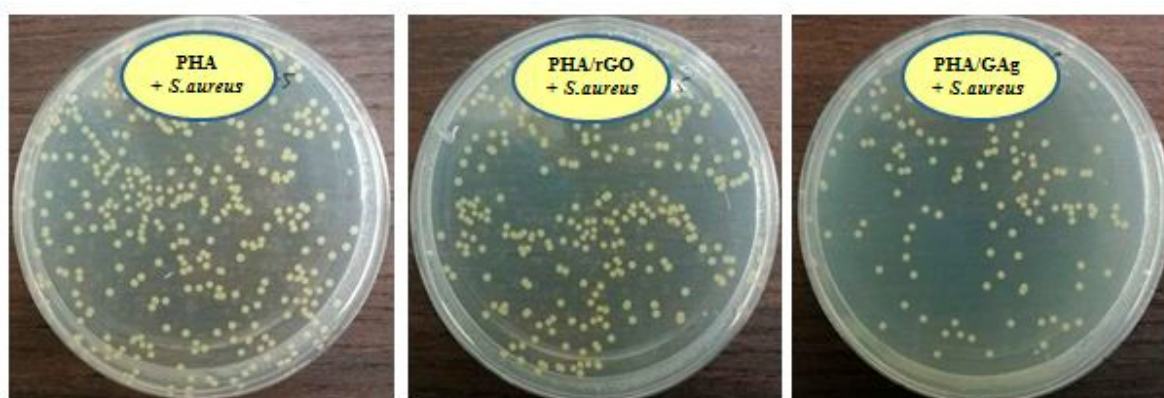

**Figure S2** The antibacterial activity after 4 h time interval, was evaluated for PHA, PHA/rGO and PHA/GAg against *S.aureus*. Significant decrease is observed in the CFU which demonstrates the bactericidal activity of PHA/rGO and PHA/GAg compare to PHA alone. PHA/rGO and PHA/GAg has shown less reduction compare to *E.coli*. Positive control data has not presented here
